# Supplementary material for: The Chemical Composition and Antimitotic, Antioxidant, Antibacterial and Cytotoxic Properties of the Defensive Gland Extract of the Beetle, Luprops tristis Fabricius
Source: MDPI journal article supplement (doi:10.3390/molecules27217476), 2022-11-02
Supplement: s1 [file s1]

Acq. Data Name: E186SANSKRIT\_01  
 Comment: SPLIT1:10-80-8-200-3M-6-275-5M-5-280-EB5...  
 Ionizing Volt: 70[V]  
 External Sample Id: 01  
 Instrument Configuration: JMS-T100GCV

Experiment Date/Time: 2/20/2020 12:54:48 PM  
 Ionization Mode: EI+  
 JEOL The AccuTOF GCv: 35.00..650.00

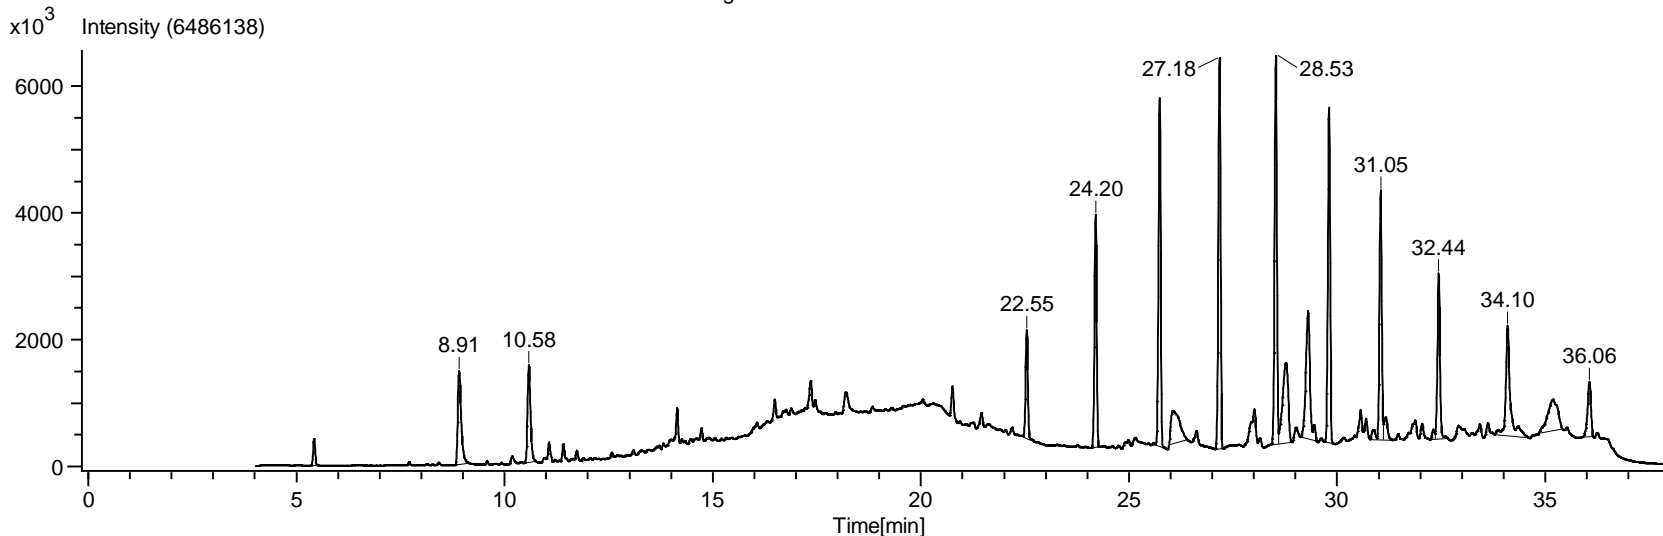

| Peak Number | Time [min] | Type | Peak Width(FWH) [min] | Area [Intens. * sec] | Height     | Description | Start Point |        | End Point  |        |
|-------------|------------|------|-----------------------|----------------------|------------|-------------|-------------|--------|------------|--------|
|             |            |      |                       |                      |            |             | Time [min]  | Height | Time [min] | Height |
| 1           | 5.43       | BB   | 0.0520                | 1372221.18           | 417753.59  |             | 5.33        | 13957  | 5.50       | 19105  |
| 2           | 8.91       | BB   | 0.0831                | 8363502.30           | 1475792.19 |             | 8.78        | 20450  | 9.14       | 53116  |
| 3           | 10.58      | BB   | 0.0749                | 7591079.93           | 1532743.98 |             | 10.44       | 53650  | 10.76      | 79924  |
| 4           | 22.55      | BB   | 0.0593                | 6665423.53           | 1710943.08 |             | 22.39       | 480772 | 22.75      | 380285 |
| 5           | 24.20      | BB   | 0.0585                | 13608522.51          | 3674449.07 |             | 24.10       | 292917 | 24.28      | 307242 |
| 6           | 25.74      | BB   | 0.0593                | 20750685.18          | 5489156.04 |             | 25.64       | 346657 | 25.91      | 269666 |
| 7           | 26.05      | BB   | 0.2511                | 7539310.21           | 516188.78  |             | 25.96       | 346408 | 26.40      | 417755 |
| 8           | 27.18      | BB   | 0.0607                | 23938840.52          | 6171654.31 |             | 27.07       | 267047 | 27.26      | 279729 |
| 9           | 28.53      | BV   | 0.0603                | 23815846.49          | 6139037.94 |             | 28.35       | 332579 | 28.60      | 353240 |
| 10          | 28.77      | VB   | 0.1479                | 11953684.37          | 1266707.86 |             | 28.60       | 353240 | 28.91      | 379487 |
| 11          | 29.30      | BB   | 0.1007                | 14209764.84          | 2013546.36 |             | 29.13       | 462879 | 29.51      | 402981 |
| 12          | 29.81      | BB   | 0.0598                | 20197957.21          | 5294588.41 |             | 29.69       | 387686 | 29.94      | 352370 |
| 13          | 30.88      | BV   | 0.0998                | 886844.44            | 147928.16  |             | 30.79       | 427071 | 30.95      | 423856 |
| 14          | 31.05      | VV   | 0.0608                | 15341476.25          | 3937103.44 |             | 30.95       | 423856 | 31.11      | 420769 |
| 15          | 31.17      | VB   | 0.1014                | 2073482.52           | 354184.91  |             | 31.11       | 420769 | 31.33      | 416525 |
| 16          | 32.31      | BV   | 0.0811                | 647679.12            | 154677.15  |             | 32.22       | 423773 | 32.36      | 428577 |
| 17          | 32.44      | VB   | 0.0661                | 11395221.72          | 2615177.91 |             | 32.36       | 428577 | 32.66      | 439383 |
| 18          | 34.10      | BB   | 0.0846                | 13373258.55          | 1740620.72 |             | 33.77       | 504172 | 34.60      | 453333 |
| 19          | 35.18      | BB   | 0.2789                | 8312741.74           | 486847.71  |             | 34.84       | 524367 | 35.41      | 594495 |
| 20          | 36.06      | BB   | 0.0855                | 4884788.37           | 865047.37  |             | 35.88       | 459278 | 36.15      | 476020 |
